# Supplementary material for: Thermal acclimation mitigates cold-induced paracellular leak from the Drosophila gut
Source: PubMed Central journal article supplement (PMC5562827; doi:10.1038/s41598-017-08926-7), 2017-08-18
Supplement: 41598_2017_8926_MOESM1_ESM.pdf [file 41598_2017_8926_MOESM1_ESM.pdf]

## SUPPLEMENTARY FIGURES AND TABLES

### **Thermal acclimation mitigates cold-induced paracellular leak from the *Drosophila* gut**

Heath A. MacMillan\*, Gil Yerushalmi, Sima Jonusaite, Scott P. Kelly and Andrew Donini

Correspondence to: [heath.macmillan@carleton.ca](mailto:heath.macmillan@carleton.ca)

**Table S1.** Changes in mRNA abundance of known or putative septate junction genes (those included in the Gene Ontology record “Septate Junction Assembly” for *Drosophila melanogaster*) in response to thermal acclimation. Adult male flies were acclimated to 6°C (cold) or 21.5°C (warm) and snap frozen for RNAseq analysis. Data from MacMillan et al. (MacMillan et al., 2016) – see referenced study for further details. Genes in bold were significantly differentially expressed in response to thermal acclimation following false discovery rate correction (*Q*-value). Blue = higher in cold-acclimated flies (20/34 genes, 59%), Red = higher in warm-acclimated flies (2/34 genes, 6%). Genes marked with an X were further investigated in the present study.

| Gene name                                      | Symbol                       | Flybase ID         | Fold change | P-value           | Q-value           | This study |
|------------------------------------------------|------------------------------|--------------------|-------------|-------------------|-------------------|------------|
| Na pump $\alpha$ subunit                       | Atp $\alpha$                 | FBgn0002921        | 0.84        | 0.078             | 0.166             |            |
| <b>big bang</b>                                | <b>bbg</b>                   | <b>FBgn0087007</b> | <b>0.75</b> | <b>0.003</b>      | <b>0.009</b>      |            |
| boudin                                         | bou                          | FBgn0261284        | 0.96        | 0.891             | 0.943             |            |
| <b>coiled</b>                                  | <b>cold</b>                  | <b>FBgn0031268</b> | <b>1.31</b> | <b>0.007</b>      | <b>0.020</b>      |            |
| Contactin                                      | Cont                         | FBgn0037240        | 1.18        | 0.074             | 0.159             |            |
| coracle                                        | cora                         | FBgn0010434        | 0.93        | 0.313             | 0.481             | X          |
| crimped                                        | crim                         | FBgn0036198        | 0.99        | 0.956             | 0.976             |            |
| <b>crooked</b>                                 | <b>crok</b>                  | <b>FBgn0032421</b> | <b>1.79</b> | <b>&lt;0.0001</b> | <b>&lt;0.0001</b> |            |
| <b>discs large</b>                             | <b>dlg1</b>                  | <b>FBgn0001624</b> | <b>1.35</b> | <b>0.004</b>      | <b>0.014</b>      | X          |
| G protein $\alpha$ i subunit                   | G $\alpha$ i                 | FBgn0001104        | 1.15        | 0.089             | 0.186             |            |
| <b>G protein <math>\alpha</math> o subunit</b> | <b>G<math>\alpha</math>o</b> | <b>FBgn0001122</b> | <b>1.71</b> | <b>&lt;0.0001</b> | <b>0.0002</b>     |            |
| <b>Germinal centre kinase III</b>              | <b>GckIII</b>                | <b>FBgn0266465</b> | <b>0.81</b> | <b>0.0084</b>     | <b>0.025</b>      |            |
| <b>gliotactin</b>                              | <b>Gli</b>                   | <b>FBgn0001987</b> | <b>1.65</b> | <b>&lt;0.0001</b> | <b>&lt;0.0001</b> |            |
| <b>kune-kune</b>                               | <b>kune</b>                  | <b>FBgn0033032</b> | <b>1.22</b> | <b>0.015</b>      | <b>0.041</b>      | X          |
| <b>lethal (2) giant larvae</b>                 | <b>l(2)gl</b>                | <b>FBgn0002121</b> | <b>1.74</b> | <b>&lt;0.0001</b> | <b>&lt;0.0001</b> |            |
| <b>lachesin</b>                                | <b>Lac</b>                   | <b>FBgn0010238</b> | <b>1.98</b> | <b>&lt;0.0001</b> | <b>&lt;0.0001</b> |            |
| locomotion defects                             | loco                         | FBgn0020278        | 1.08        | 0.548             | 0.708             |            |
| <b>Macroglobulin complement-related</b>        | <b>Mcr</b>                   | <b>FBgn0267488</b> | <b>1.29</b> | <b>0.0004</b>     | <b>0.002</b>      |            |
| <b>mesh</b>                                    | <b>mesh</b>                  | <b>FBgn0051004</b> | <b>0.68</b> | <b>&lt;0.0001</b> | <b>&lt;0.0001</b> | X          |
| moody                                          | moody                        | FBgn0025631        | 0.97        | 0.674             | 0.806             |            |
| <b>neuroglian</b>                              | <b>Nrg</b>                   | <b>FBgn0264975</b> | <b>1.63</b> | <b>&lt;0.0001</b> | <b>&lt;0.0001</b> |            |
| <b>nrv2</b>                                    | <b>nrv2</b>                  | <b>FBgn0015777</b> | <b>1.94</b> | <b>&lt;0.0001</b> | <b>&lt;0.0001</b> |            |
| <b>neurexin IV</b>                             | <b>Nrx-IV</b>                | <b>FBgn0013997</b> | <b>1.69</b> | <b>&lt;0.0001</b> | <b>&lt;0.0001</b> |            |
| p21-activated kinase                           | Pak                          | FBgn0267698        | 1.06        | 0.557             | 0.716             |            |
| pasiflora 1                                    | pasi1                        | FBgn0038545        | 1.35        | 0.051             | 0.118             |            |
| <b>pasiflora 2</b>                             | <b>pasi2</b>                 | <b>FBgn0037680</b> | <b>1.59</b> | <b>&lt;0.0001</b> | <b>0.0002</b>     |            |
| <b>pickle</b>                                  | <b>pck</b>                   | <b>FBgn0013720</b> | <b>1.33</b> | <b>0.002</b>      | <b>0.006</b>      |            |
| scribbled                                      | scrib                        | FBgn0263289        | 0.78        | 0.521             | 0.685             | X          |
| <b>sinuous</b>                                 | <b>sinu</b>                  | <b>FBgn0010894</b> | <b>1.45</b> | <b>&lt;0.0001</b> | <b>&lt;0.0001</b> |            |
| <b>snakeskin</b>                               | <b>Ssk</b>                   | <b>FBgn0036945</b> | <b>1.38</b> | <b>0.015</b>      | <b>0.041</b>      |            |
| <b>melanotransferin</b>                        | <b>Tsf2</b>                  | <b>FBgn0036299</b> | <b>1.48</b> | <b>&lt;0.0001</b> | <b>&lt;0.0001</b> |            |
| <b>varicose</b>                                | <b>vari</b>                  | <b>FBgn0250785</b> | <b>1.50</b> | <b>&lt;0.0001</b> | <b>&lt;0.0001</b> |            |

**Table S2.** Antibodies used for immunoblotting in the present study (marked with an X in Table S1). DSHB: Developmental Studies Hybridoma Bank (Iowa City, IA, USA); SCB: Santa Cruz Biotechnology (Mississauga, ON, Canada).

| <b>Protein (<i>gene</i>)</b> | <b>Antibody source</b> | <b>Antibody catalog number or citation or epitope sequence</b> | <b>Antibody dilution factor</b> | <b>Secondary antibody host</b> |
|------------------------------|------------------------|----------------------------------------------------------------|---------------------------------|--------------------------------|
| Coracle ( <i>cora</i> )      | DSHB                   | C566.9                                                         | 1:250                           | Mouse                          |
| Discs large ( <i>dlg1</i> )  | DSHB                   | 4F3                                                            | 1:400                           | Mouse                          |
| Scribble ( <i>scrib</i> )    | SCB                    | sc-26941                                                       | 1:250                           | Goat                           |
| Mesh ( <i>mesh</i> )         | Prof. Mikio Furuse     | (Izumi et al., 2012)                                           | 1:2000                          | Rabbit                         |
| Kune-kune ( <i>kune</i> )    | Prof. Mikio Furuse     | (Nelson et al., 2010)                                          | 1:1000                          | Rabbit                         |

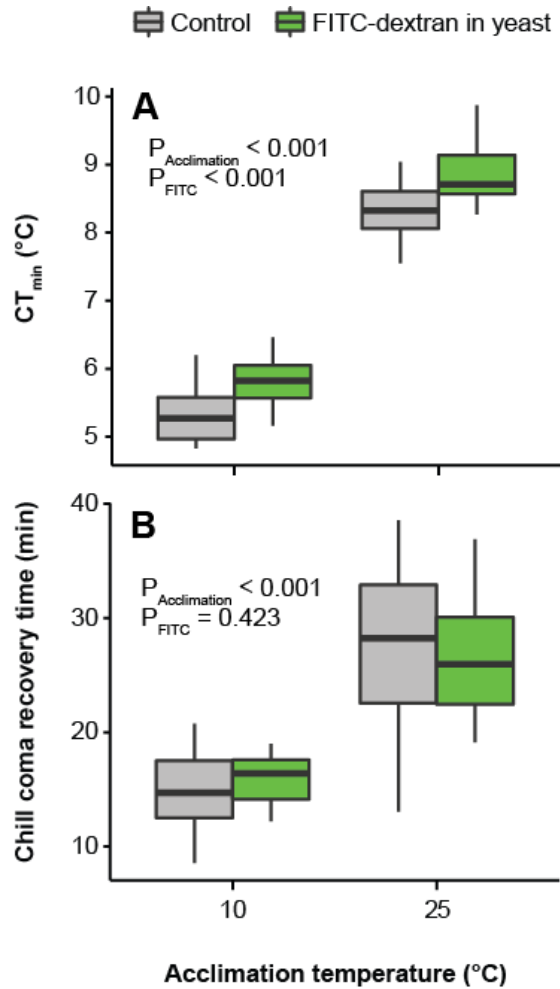

**Figure S1. The effects of feeding on FITC-dextran in yeast on cold tolerance of *D. melanogaster* females.** Critical thermal minimum (CT<sub>min</sub>; A) and chill coma recovery time (CCRT; B) were measured on flies fed for 24h on a 50  $\mu$ L droplet of a 2.5% (w/v) solution of FITC-dextran in water, mixed with 10 mg of active brewers yeast. Feeding on the FITC-dextran yeast mixture slightly increased the CT<sub>min</sub>, and had no effect on CCRT. In the case of CT<sub>min</sub>, the effects of cold acclimation remained very similar regardless of an overall increase in the CT<sub>min</sub> as an effect of feeding.

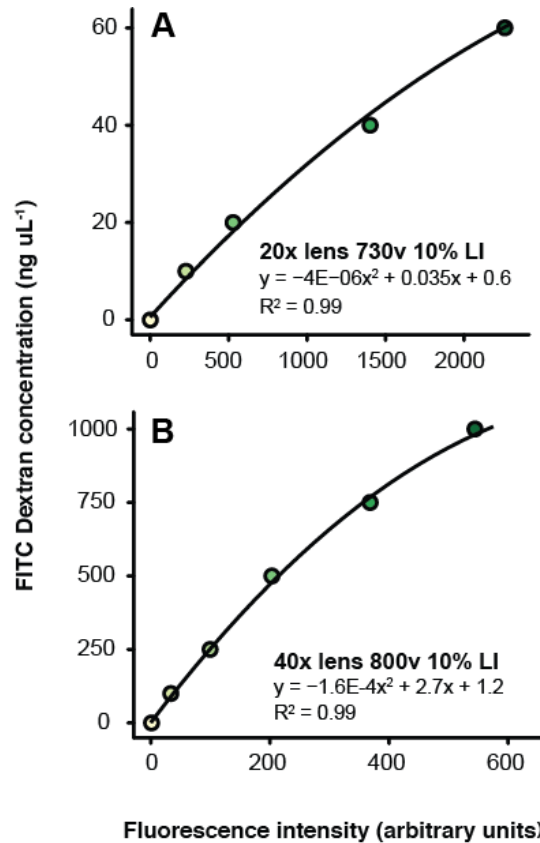

**Figure S2. Standard curves of FITC-dextran concentration measured by confocal microscopy of solutions inside rectangular microcapillaries.** FITC-dextran was quantified in microcapillaries as previously described for primary urine samples from crickets and *Drosophila* by Leader and O'Donnell (Leader and O'Donnell, 2005). Two different groups of settings were used to quantify FITC-dextran concentrations in the hemolymph to ensure accurate estimates across a broad concentration range. Points represent means of n=3 replicates at each concentration. A) Standard curve using 20x lens for lower concentrations B) Standard curve using 40x lens for higher concentrations.

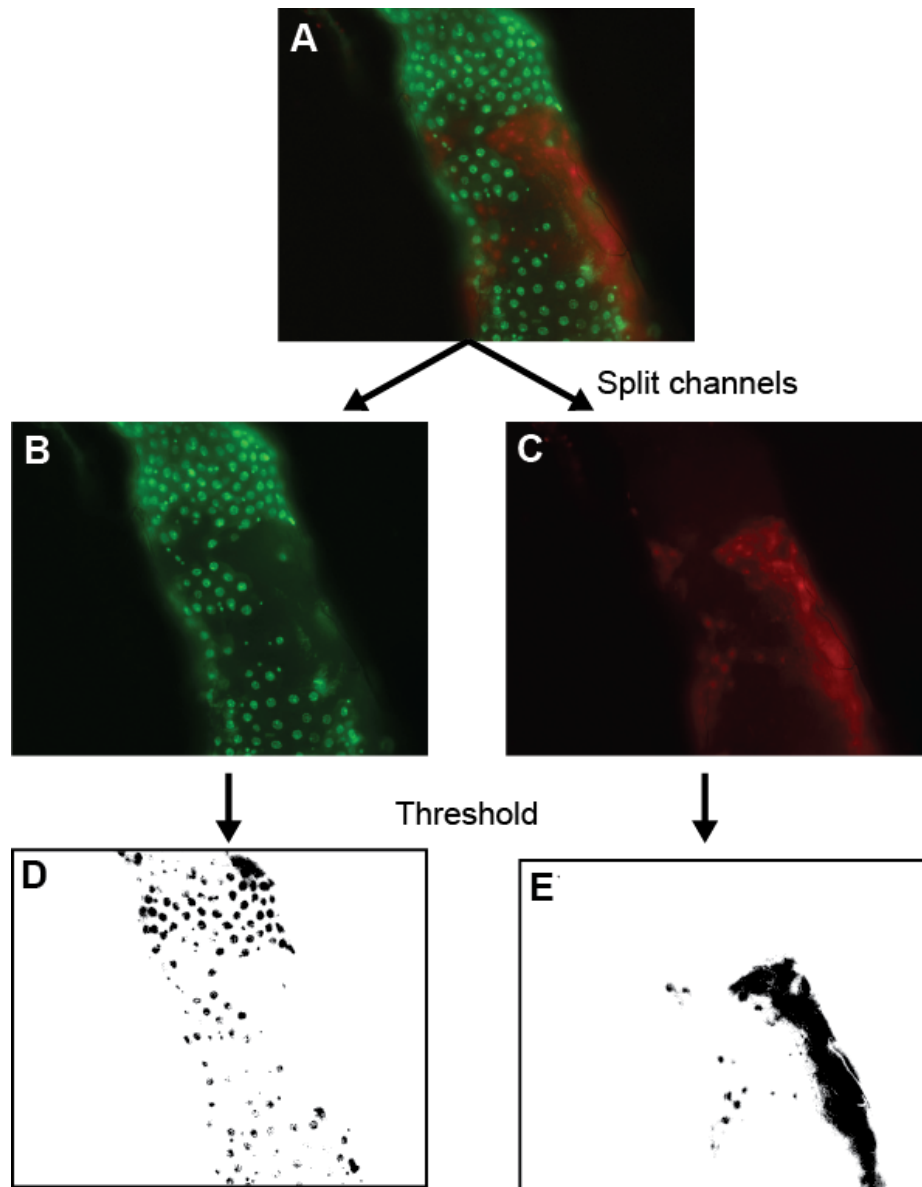

Proportion red particles:  $31/183 = 16.9\%$   
 Proportion red area:  $82092/123959 = 66.2\%$   
 Average damage: 41.6%

**Figure S3. Tissue damage image analysis method in FIJI.** Composite images (A) were split into their component green (live cells, B) and red (damaged cells, C) channels. Each channel was adjusted by automated thresholding in FIJI to produce black and white images representing areas of live or dead cells. The number of particles and proportion of area that stained as green and red were each calculated and used to estimate a proportion of the tissue that was damaged. Both Sybr-14 and propidium iodide bind DNA, but propidium iodide can only enter the cytoplasm of cells that have a damaged cell membrane. Because DNA is degraded during cell death, the two dyes produce different staining patterns. For this reason, the two methods of quantifying red staining relative to green staining are averaged to produce a final estimate of tissue damage.

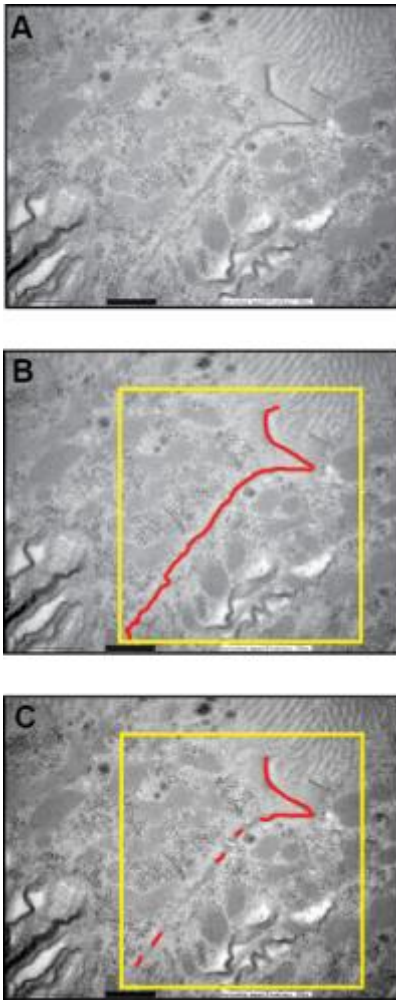

**Figure S4. Method for quantification of the cell-cell contact region and septate junctions in sections of the posterior midgut of female *Drosophila melanogaster*.** Lengths of cell-cell contact and septate junctions were quantified by an author blind to the identity of the images. (A) Original image, (B) tracing of path of cell-cell contact, and (C) tracing of identified septate junctions. A  $750 \times 750$  pixel region of the image was outlined around the region of cell-cell contact (yellow square) and within that region the path of cell-cell contact was digitally traced. Septate junctions were identified as dark regions where the two cell membranes lay in close parallel contact. Select septa were verified using higher magnification images.
